# Supplementary material for: Study of segmental dynamics and ion transport in polymer–ceramic composite electrolytes by quasi-elastic neutron scattering
Source: Royal Society of Chemistry journal article supplement (doi:10.1039/c8me00113h), 2019-01-01
Supplement: c8me00113h1.pdf [file c8me00113h1.pdf]

## Supporting Information for

### Study of Segmental Dynamics and Ion Transport in Polymer-Ceramic Composite Electrolytes by Quasi-elastic Neutron Scattering

*X. Chelsea Chen<sup>1,\*</sup>, Robert L. Sacci<sup>1</sup>, Naresh C. Osti<sup>2</sup>, Madhusudan Tyagi<sup>3,4</sup>, Yangyang Wang<sup>5</sup>, Max J. Palmer<sup>1</sup> and Nancy J. Dudney<sup>1,\*</sup>*

<sup>1</sup>*Chemical Sciences Division, <sup>2</sup>Neutron Sciences Division, <sup>5</sup>Center for Nanophase Materials Sciences, Oak Ridge National Laboratory, Oak Ridge, Tennessee, 37830, United States*

<sup>3</sup>*National Institute of Standards and Technology Center for Neutron Research, Gaithersburg, Maryland 20899, United States*

<sup>4</sup>*Department of Materials Science and Engineering, University of Maryland, College Park, Maryland 20742, United States*

**\*Corresponding authors**

**Email addresses:** *chenx@ornl.gov (X. C. Chen), dudneynj@ornl.gov (N. J. Dudney)*

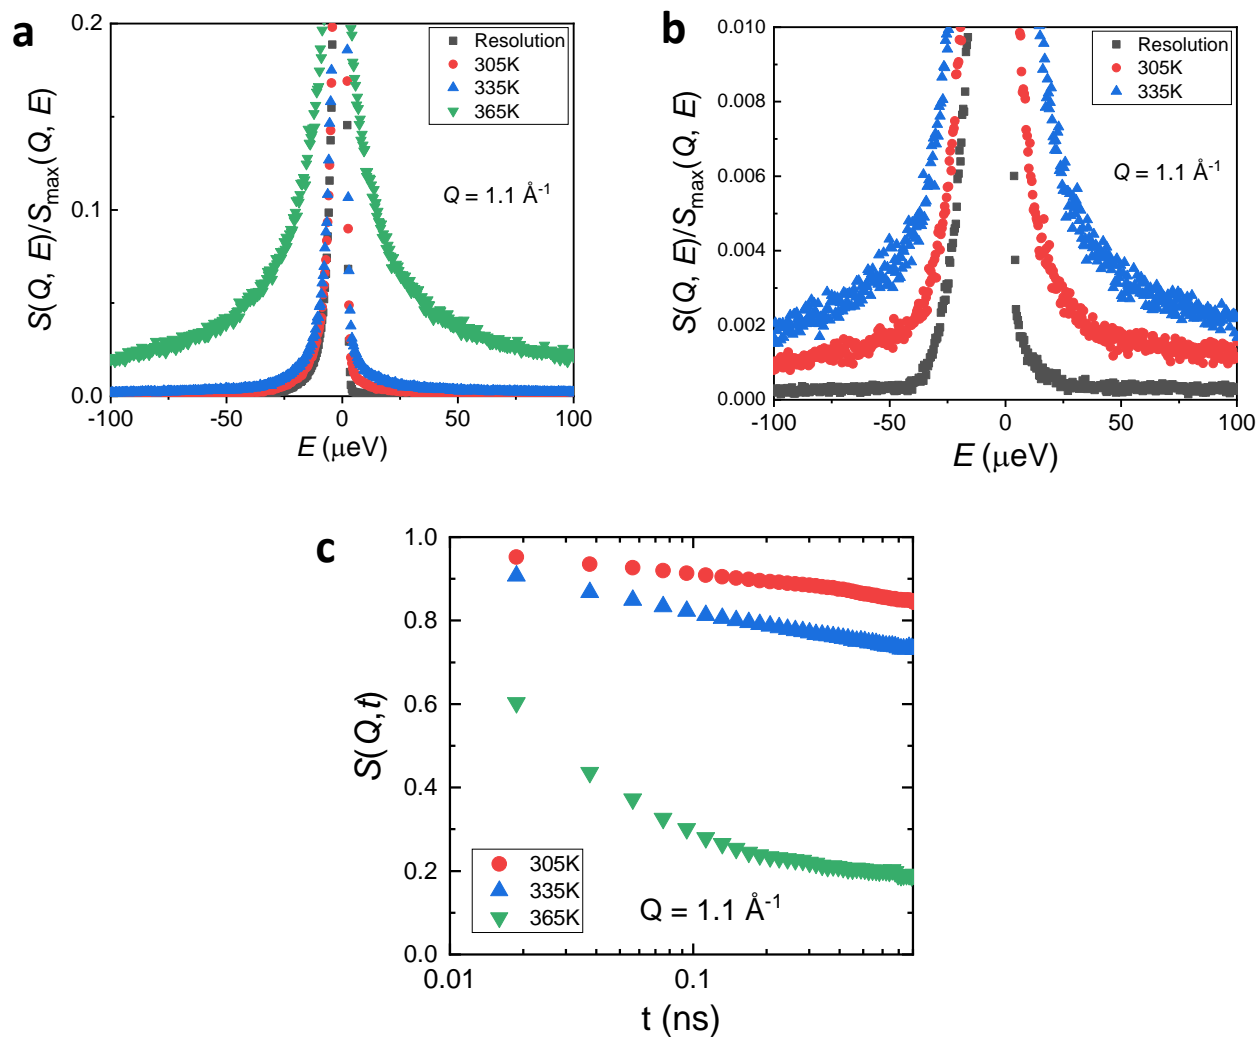

**Figure S1 a**, Normalized dynamic structure factor,  $S(Q, E)$ , of polymer electrolyte PEO + lithium triflate salt as a function of energy,  $E$ , at a representative spatial scale  $Q = 1.1 \text{ \AA}^{-1}$ , at 305K (red circles), 335K (blue up triangles) and 365K (green down triangles). The resolution function (black squares) was taken at 20K. Data was collected at BASIS beamline of Spallation Neutron Source. **b**, a zoomed-in view of **a** showing results at 305K and 335K. **c**, Intermediate scattering function,  $S(Q, t)$ , as a function of time,  $t$  at  $Q = 1.1 \text{ \AA}^{-1}$ , at 305K (red circles), 335K (blue up triangles) and 365K (green down triangles).

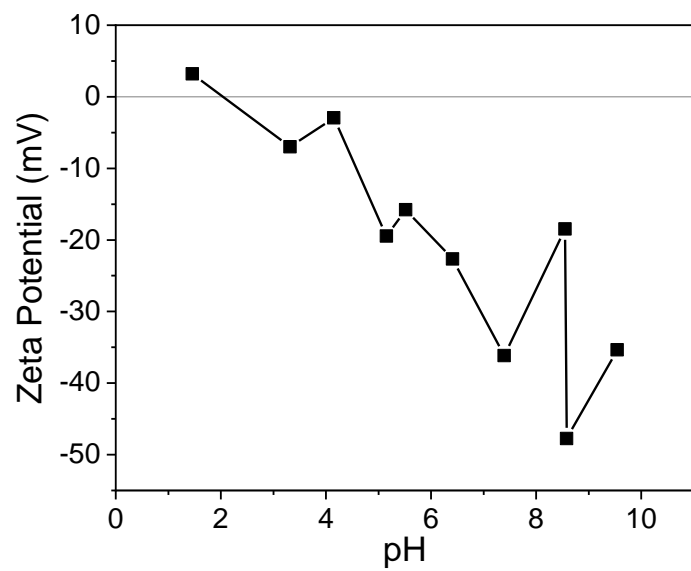

**Figure S2** Zeta potential of Ohara ceramic aqueous suspensions as a function of pH.
